# Supplementary material for: The Expression of CD109 in B-Cell Acute Lymphoblastic Leukemia and Its Potential as a Promising Marker for Minimal Residual Disease (MRD) Detection
Source: Research Square preprint supplement (doi:10.21203/rs.3.rs-6880413/v1), 2025-06-18

**Supplementary figure 1：A, B:** Comparison of CD109 Membrane Protein Expression Rate (A) and MFI (B) in Different EGIL immunological classification of B-ALL. **C, D:** Comparison of CD109 Membrane Protein Expression Rate and MFI in Ph+ B-ALL(n=27) and Ph- B-ALL(n=35). **E, F:** Comparison of CD109 Membrane Protein Expression Rate and MFI in B-ALL patients with myeloid antigen (CD13 or CD33) expression(n=26) and those without myeloid antigen expression(n=36). (*p<0.05, **p<0.01, ***p<0.001).

**F**

**E**

**D**

**C**

**B**

**A**


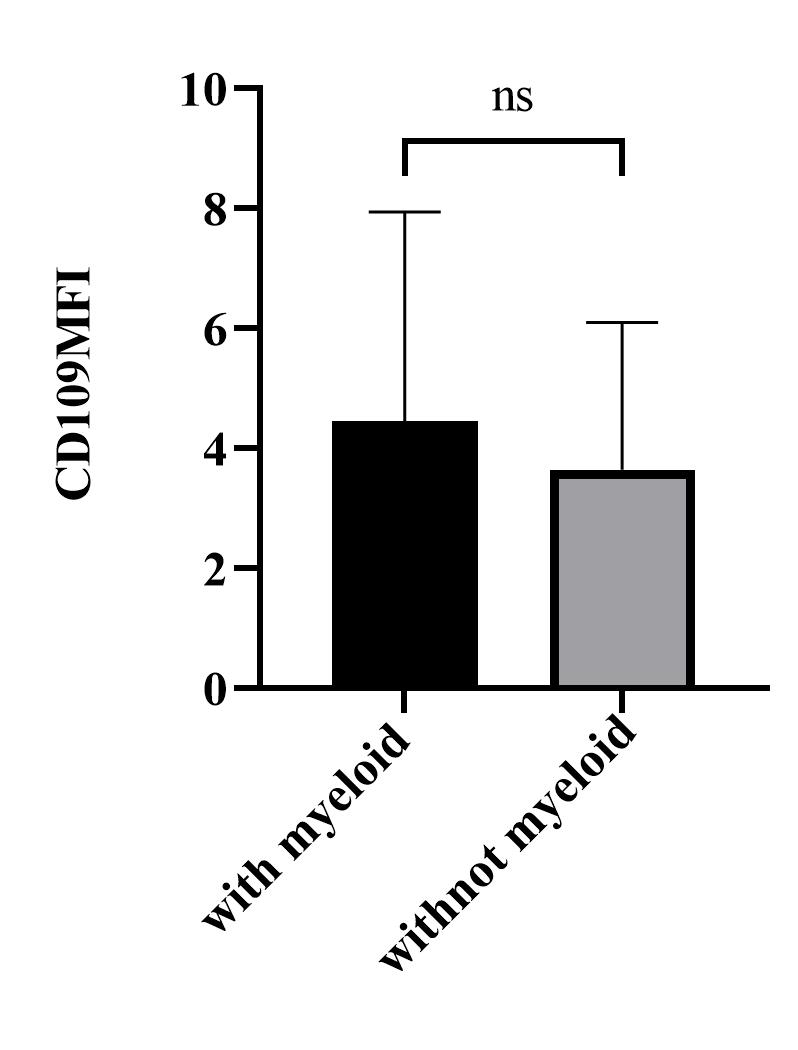


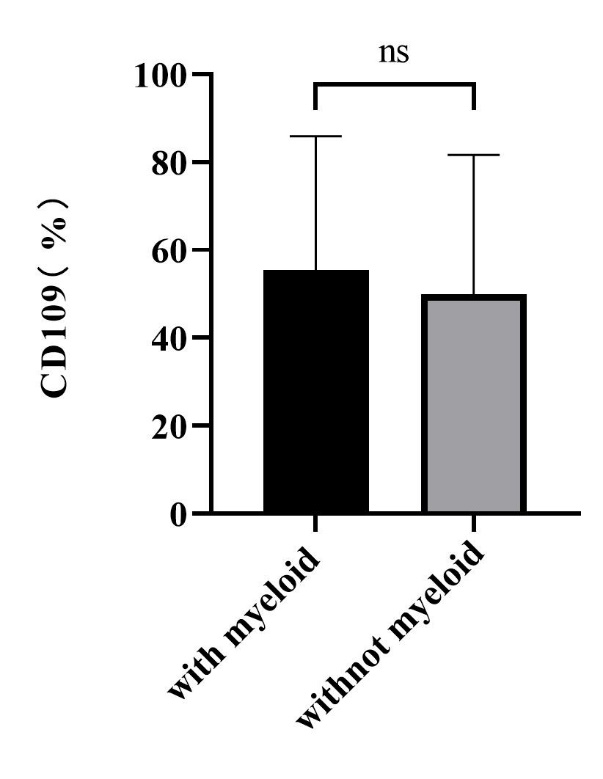


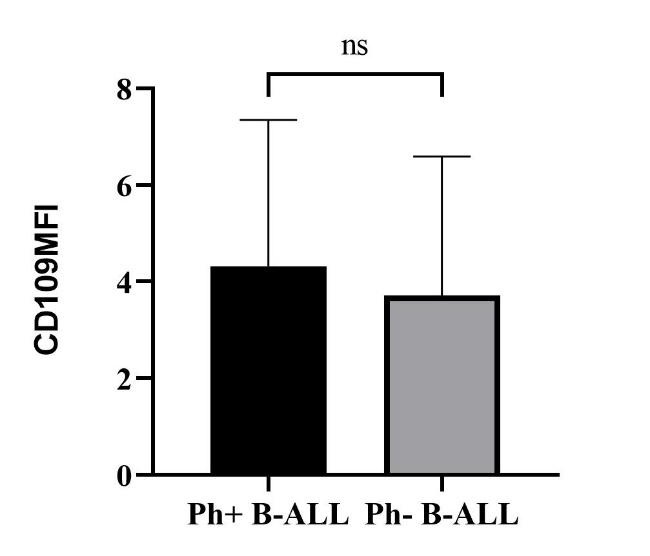


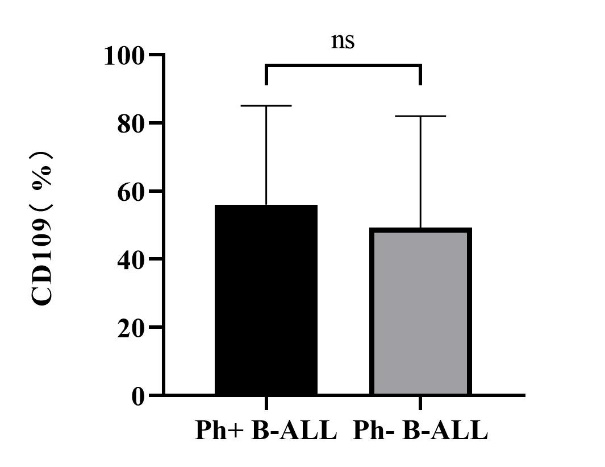


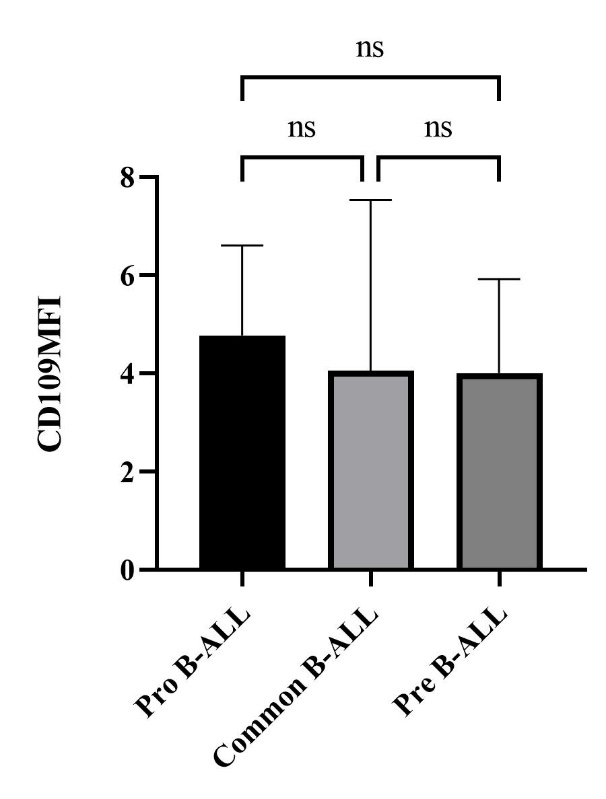


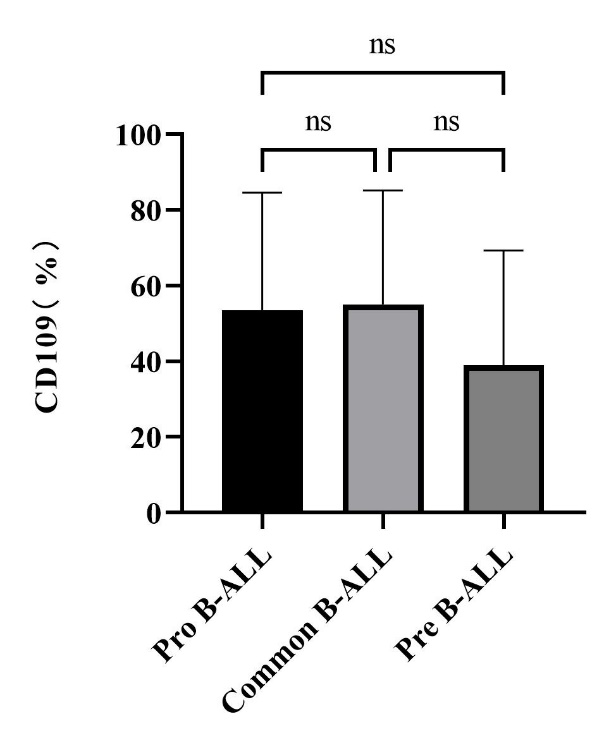

Supplement: Supplementary file 1 [file 4391cb438f2f2cc41804d654.docx]
