# Supplementary material for: The Expression of CD109 in B-Cell Acute Lymphoblastic Leukemia and Its Potential as a Promising Marker for Minimal Residual Disease (MRD) Detection
Source: Research Square preprint supplement (doi:10.21203/rs.3.rs-6880413/v1), 2025-06-18

**Supplementary figure 2**: A comparison of CD109-positive expression rates (A) and MFI (B) between the initial diagnosis and MRD-positive states in the follow-up study of 8 CD109-positive B-ALL patients. (*p<0.05, **p<0.01, ***p<0.001).

**A**

**B**


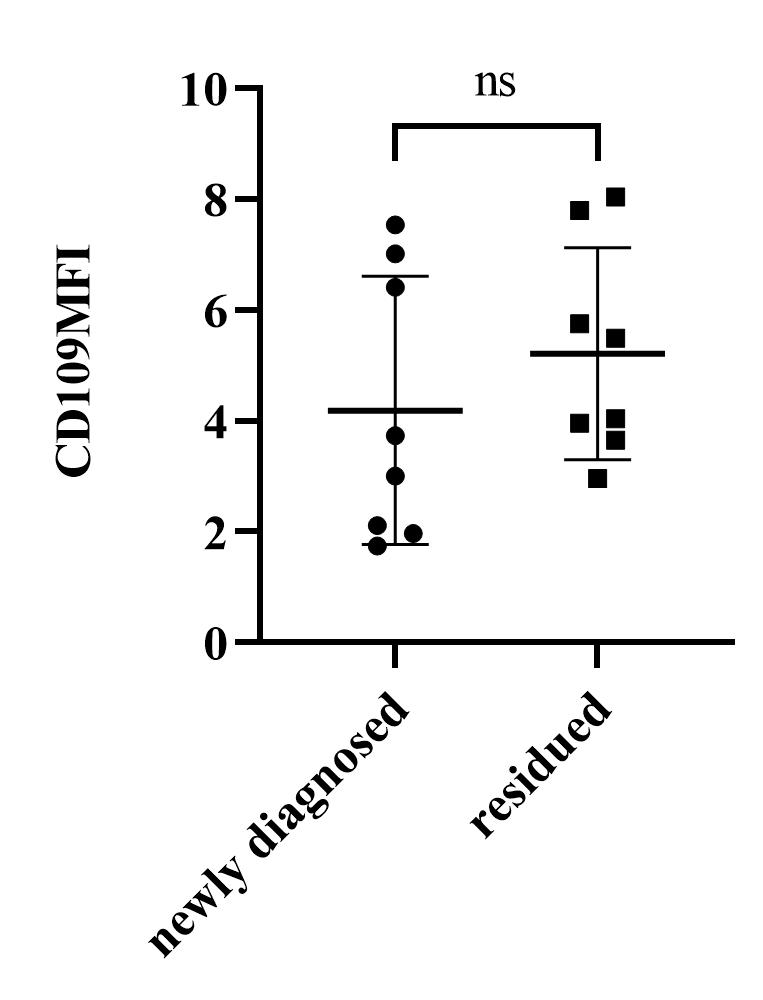


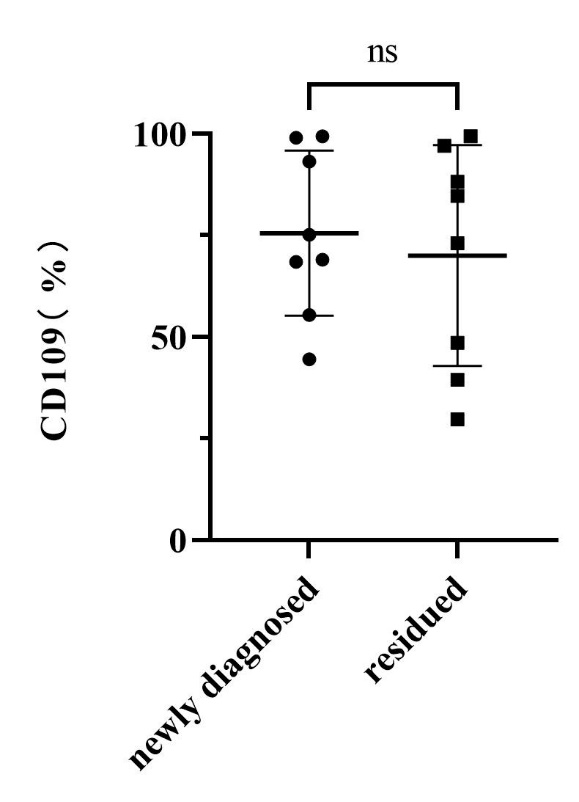

Supplement: Supplementary file 2 [file f87db9b868a0f582b782cd90.docx]
